# Supplementary material
Source: PubMed Central journal article supplement (PMC3179243)
Supplement: 10.4300_JGME-D-10-00173.1.s1.pdf [file 10.4300_JGME-D-10-00173.1.s1.pdf]

Figure. Paper version of the Emergency Medicine Humanism Scale.

Resident:

*Nursing Evaluation of Resident Staff*

*Please circle the appropriate rating for each question. If unable to evaluate, leave blank.*

**Ability to cooperate with medical colleagues**

|                   |   |   |              |   |   |             |   |   |
|-------------------|---|---|--------------|---|---|-------------|---|---|
| 1                 | 2 | 3 | 4            | 5 | 6 | 7           | 8 | 9 |
| Needs improvement |   |   | Satisfactory |   |   | Outstanding |   |   |

**Ability to cooperate with nurses**

|                   |   |   |              |   |   |             |   |   |
|-------------------|---|---|--------------|---|---|-------------|---|---|
| 1                 | 2 | 3 | 4            | 5 | 6 | 7           | 8 | 9 |
| Needs improvement |   |   | Satisfactory |   |   | Outstanding |   |   |

**Ability to cooperate with ancillary medical staff (Clerks, Clinical Assistants)**

|                   |   |   |              |   |   |             |   |   |
|-------------------|---|---|--------------|---|---|-------------|---|---|
| 1                 | 2 | 3 | 4            | 5 | 6 | 7           | 8 | 9 |
| Needs improvement |   |   | Satisfactory |   |   | Outstanding |   |   |

**Quality of physician-patient relationship**

|                   |   |   |              |   |   |             |   |   |
|-------------------|---|---|--------------|---|---|-------------|---|---|
| 1                 | 2 | 3 | 4            | 5 | 6 | 7           | 8 | 9 |
| Needs improvement |   |   | Satisfactory |   |   | Outstanding |   |   |

**Ability to render comfort and empathy**

|                   |   |   |              |   |   |             |   |   |
|-------------------|---|---|--------------|---|---|-------------|---|---|
| 1                 | 2 | 3 | 4            | 5 | 6 | 7           | 8 | 9 |
| Needs improvement |   |   | Satisfactory |   |   | Outstanding |   |   |

**Involvement of patient in decision making**

|                   |   |   |              |   |   |             |   |   |
|-------------------|---|---|--------------|---|---|-------------|---|---|
| 1                 | 2 | 3 | 4            | 5 | 6 | 7           | 8 | 9 |
| Needs improvement |   |   | Satisfactory |   |   | Outstanding |   |   |

**Consideration of patients' concerns**

|                   |   |   |              |   |   |             |   |   |
|-------------------|---|---|--------------|---|---|-------------|---|---|
| 1                 | 2 | 3 | 4            | 5 | 6 | 7           | 8 | 9 |
| Needs improvement |   |   | Satisfactory |   |   | Outstanding |   |   |

**Ability to place patients at ease**

|                   |   |   |              |   |   |             |   |   |
|-------------------|---|---|--------------|---|---|-------------|---|---|
| 1                 | 2 | 3 | 4            | 5 | 6 | 7           | 8 | 9 |
| Needs improvement |   |   | Satisfactory |   |   | Outstanding |   |   |

**Ability to admit one's own errors**

|                   |   |   |              |   |   |             |   |   |
|-------------------|---|---|--------------|---|---|-------------|---|---|
| 1                 | 2 | 3 | 4            | 5 | 6 | 7           | 8 | 9 |
| Needs improvement |   |   | Satisfactory |   |   | Outstanding |   |   |

*Thank you*

Garra G, Wackett A, Thode H. Feasibility and Reliability of a Multisource Feedback Tool for Emergency Medicine Residents. *J Grad Med Educ.* 2011;3(3):356-359.
